# Supplementary material for: Assessment of Rod, Cone, and Intrinsically Photosensitive Retinal Ganglion Cell Contributions to the Canine Chromatic Pupillary Response
Source: PubMed Central journal article supplement — Invest Ophthalmol Vis Sci. 2017 Jan;58(1):65–78. doi: 10.1167/iovs.16-19865 (PMC5231906; doi:10.1167/iovs.16-19865), 2017-01
Supplement: iovs-57-15-22_s01.pdf [file iovs-57-15-22_s01.pdf]

**Supplementary Table S1.** Summary of Dogs Used for Molecular Analyses

| Disease             | Dog    | Gender | Age (years) | Studies                  |
|---------------------|--------|--------|-------------|--------------------------|
| WT                  | 1984   | F      | 0.8         | Sequence/cloning         |
|                     | 1985   | F      | 0.9         | Sequence/cloning/qRT-PCR |
|                     | V11614 | -      | 0.06        | qRT-PCR                  |
|                     | M656   | M      | 0.5         | qRT-PCR                  |
|                     | GS170  | M      | 0.8         | qRT-PCR                  |
|                     | Mateo  | M      | 0.5         | IHC                      |
| <i>CNGB3</i> -ACHM  | GS86   | M      | 0.6         | qRT-PCR                  |
|                     | M550   | M      | 0.08        | qRT-PCR                  |
|                     | GS53   | F      | 2.2         | qRT-PCR                  |
|                     | M676   | M      | 0.4         | qRT-PCR                  |
|                     | M681   | F      | 0.4         | qRT-PCR                  |
|                     | M614   | F      | 2.5         | qRT-PCR                  |
|                     | GS171  | M      | 0.8         | qRT-PCR                  |
|                     | M501   | F      | 7.3         | IHC                      |
| <i>PRCD</i> -prcd   | X168   | F      | 4.8         | qRT-PCR                  |
|                     | X225   | M      | 3.5         | qRT-PCR                  |
|                     | P774   | F      | 3           | qRT-PCR                  |
|                     | P1450* | F      | 8.2         | IHC                      |
| <i>RPGR</i> -XLPRA2 | Z234   | M      | 0.06        | qRT-PCR                  |
| <i>PDE6B</i> -rcd1  | 2055   | F      | 0.06        | qRT-PCR                  |
|                     | 1888   | M      | 0.3         | IHC                      |
|                     | 2016   | F      | 1.5         | IHC                      |
| <i>STK38L</i> -erd  | E1044* | M      | 8.4         | IHC                      |

\* Chromatic pupillometry performed

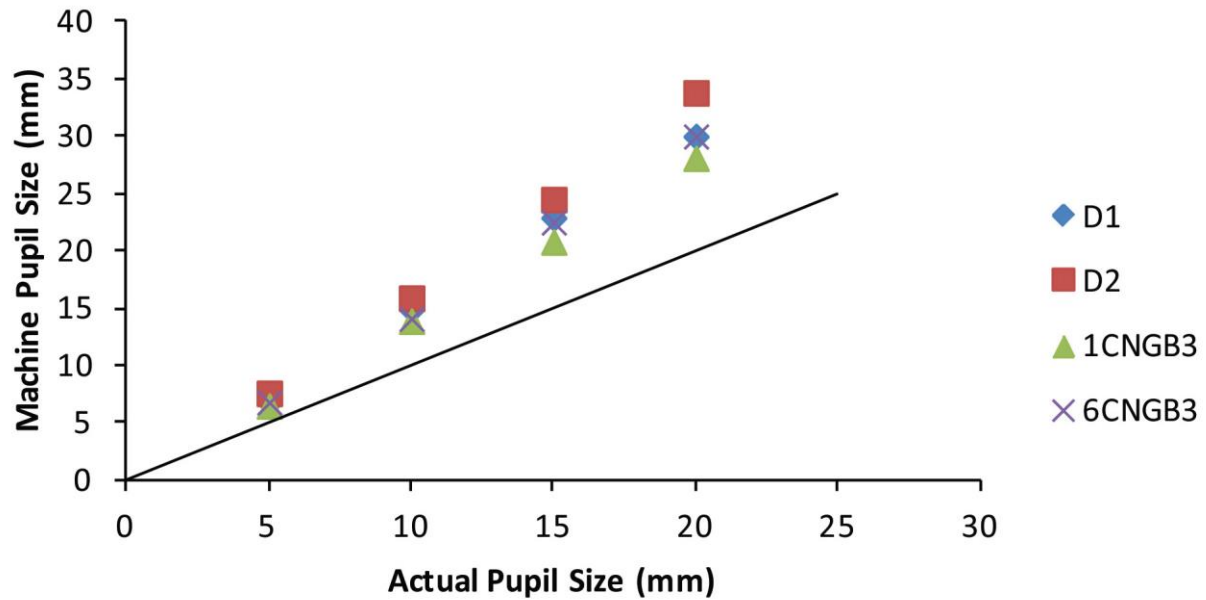

**Supplementary Figure S1.** Machine-measured pupil size vs. actual pupil size in 4 dogs. D1 and D2 are WT dogs that were not included in the main study. *Solid black line* shows  $x = y$ .

**Supplementary Table S2.** Light Intensities Used for Chromatic Pupillometry and Corresponding Corneal Irradiances.

| Light Intensities<br>(cd/m <sup>2</sup> ) | Irradiance - Blue Stimulus (470 nm)<br>(μW/cm <sup>2</sup> ) | Irradiance – Red Stimulus (640 nm)<br>(μW/cm <sup>2</sup> ) |
|-------------------------------------------|--------------------------------------------------------------|-------------------------------------------------------------|
| 1                                         | 2.8                                                          | 0.2                                                         |
| 10                                        | 22.6                                                         | 9.9                                                         |
| 32                                        | 73.4                                                         | 31.0                                                        |
| 100                                       | 237.0                                                        | 98.8                                                        |
| 400                                       | 926.7                                                        | 402.1                                                       |

**Supplementary Table S3. Antibodies Used**

| Antigen                              | Host              | Catalogue No./Source                             | Working Dilution | Normal Retina Localization                                          |
|--------------------------------------|-------------------|--------------------------------------------------|------------------|---------------------------------------------------------------------|
| Cone <i>alpha</i> transducin (GNAT2) | Rabbit polyclonal | Santa Cruz sc-390                                | 1:5000           | Cone outer segments                                                 |
| Human cone arrestin (hCAR)           | Rabbit polyclonal | Cheryl Craft (University of Southern California) | 1:5000           | Cone photoreceptors                                                 |
| Neural Nuclei (NeuN) cloneA60        | Mouse polyclonal  | Millipore MAB377                                 | 1:2000           | Ganglion cells                                                      |
| Neurofilament 200 (NF200)            | Rabbit polyclonal | Sigma N4142                                      | 1:1000           | Nerve fiber, outer and inner plexiform layer                        |
| L/M opsin                            | Rabbit polyclonal | Millipore AB5405                                 | 1:500            | Outer segments of long- and medium-wavelength-absorbing (L/M)-cones |
| Melanopsin 1                         | Rabbit            | 21st Century                                     | 1:1000           | ipRGCs                                                              |
| Rhodopsin                            | Mouse monoclonal  | Millipore MAB5316                                | 1:1000           | Rod outer segments/axons and pedicles                               |

Santa Cruz Biotechnology Inc., Santa Cruz, CA; Millipore Corporation, Temecula, CA; Sigma-Aldrich Co. LLC., St. Louis, MO; 21<sup>st</sup> Century Biochemicals, Marlboro, MA

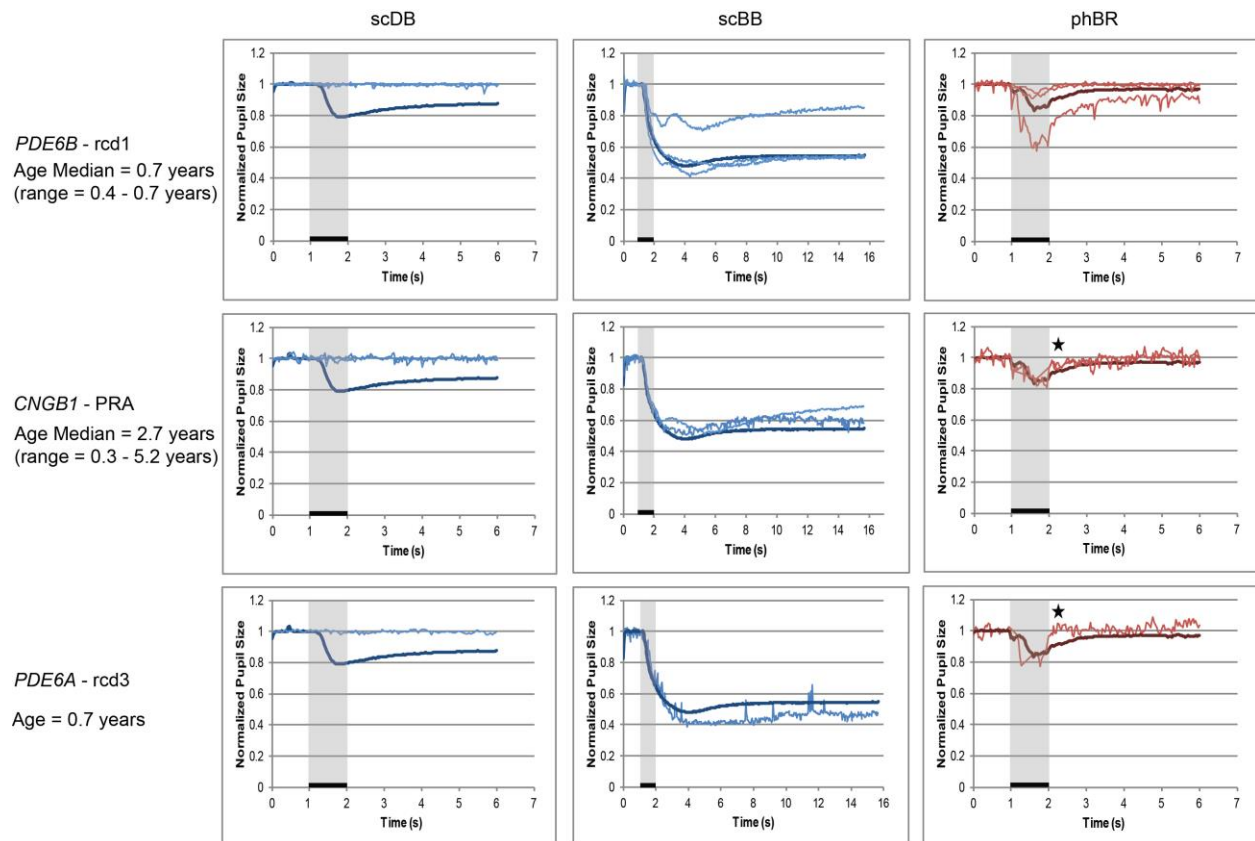

**Supplementary Figure S2.** Effects of mutations in *PDE6B*, *CNGB1*, and *PDE6A* on PLRs compared to average *wt* PLRs. **Bold blue and red lines** represent mean PLRs of *wt* dogs. **Lighter blue and red lines** represent individual PLRs from affected dogs. ★ indicates undetectable PLRs from *PDE6A*- and *CNGB1*-mutant dogs overshadowed by a light artifact. **Shaded area/black bar** represents 1-s stimulus presentation.

*CNGB3* - ACHM  
Age Median = 2.5 years  
(range = 0.6 - 4 years)  
n = 4

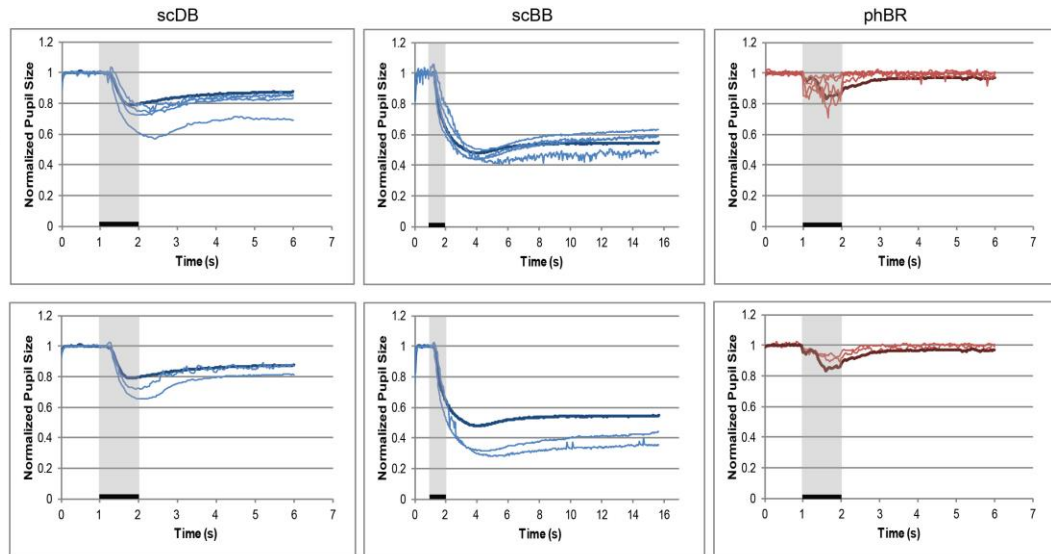

*CNGB3* - ACHM  
(with response to  
bright red stimulus)  
Age = 1 years  
n = 2

**Supplementary Figure S3.** PLRs from *CNGB3*-mutant dogs with ACHM with the expected abrogation of phBR responses. In contrast, a subset of *CNGB3*-mutant dogs with incomplete ACHM showed persistent but reduced phBR responses. *Bold blue* and *bold red lines* represent averaged PLRs from *wt* dogs. *Lighter blue* and *red lines* represent individual PLRs from affected dogs. *Shaded area/black bar* represents the 1-s light stimulus presentation.

*PDE6B* - rcd1  
Age Median = 5.7 years  
(range = 5.3 - 6.0 years)

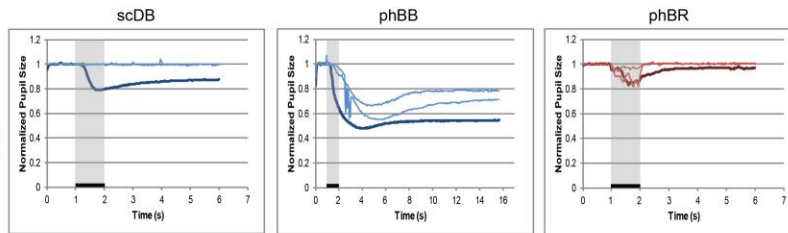

*RD3* - rcd2  
Age Median = 3.3 years  
(range = 1.3 - 3.7 years)

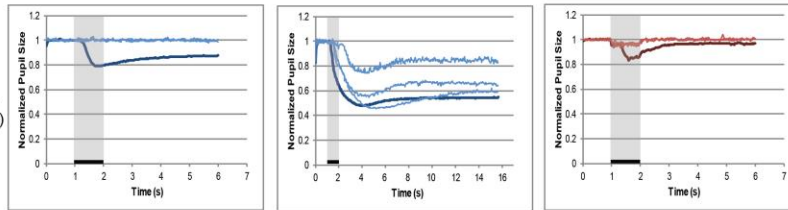

*PDE6A* - rcd3  
Age = 3.8 years

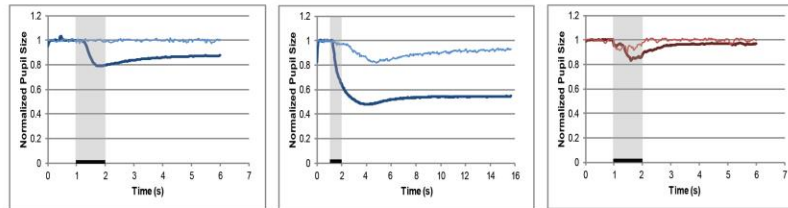

*STK38L* - erd  
Age Median = 3.5 years  
(range = 3.5 - 8.4 years)

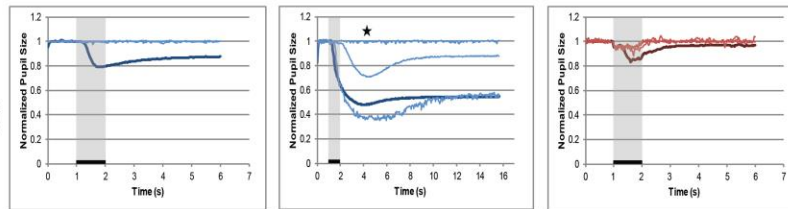

*IQCB1* - crd2  
Age Median = 2.7 years  
(range = 1.5 - 3.8 years)

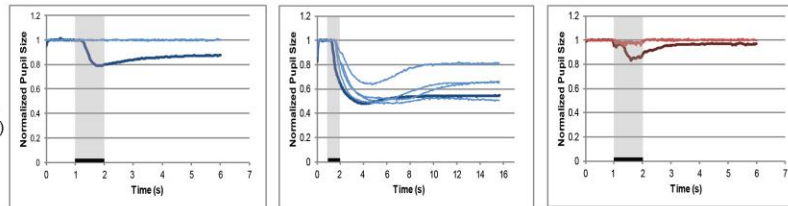

*RPGR* - XLPRA2  
Age Median = 6.5 years  
(range = 5.8 - 7.2 years)

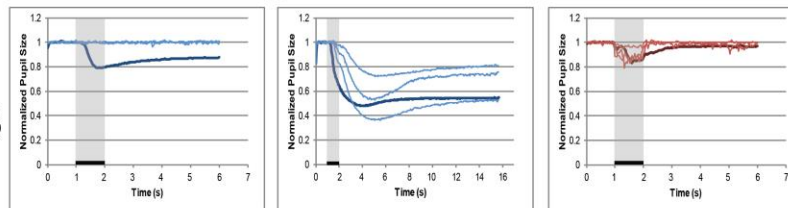

*RPE65* - LCA  
Age Median = 1.4 years  
(range = 0.8 - 4.4 years)

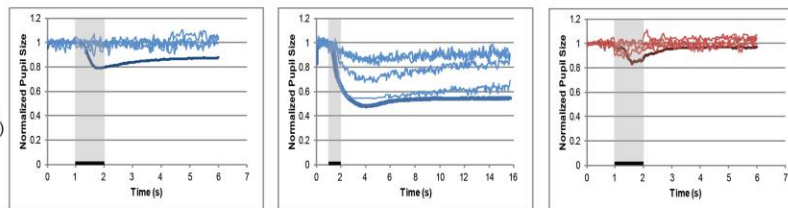

*PRCD* - procd  
Age Median = 7.1 years  
(range = 5.9 - 8.3 years)

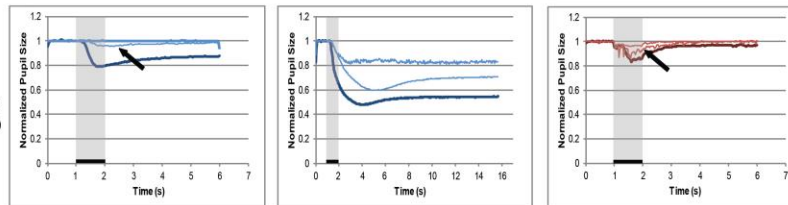

**Supplementary Figure S4.** PLRs of dogs bearing mutations in *STK38L*, *IQCB1*, *RPGR*, *RPE65*, and *PRCD*, and older dogs with *PDE6B*, *RD3*, and *PDE6A* mutations. **Bold blue and red lines** represent averaged PLRs of *wt* dogs. **Lighter blue and red lines** represent individual PLRs of affected dogs. **Shaded area/black bar** represents the 1-s light stimulus presentation. ★ indicates absent PLR to scBB in one older *STK38L*-mutant. **Arrows** indicate small residual rod function and near-normal preserved cone function in an older *PRCD*-mutant.

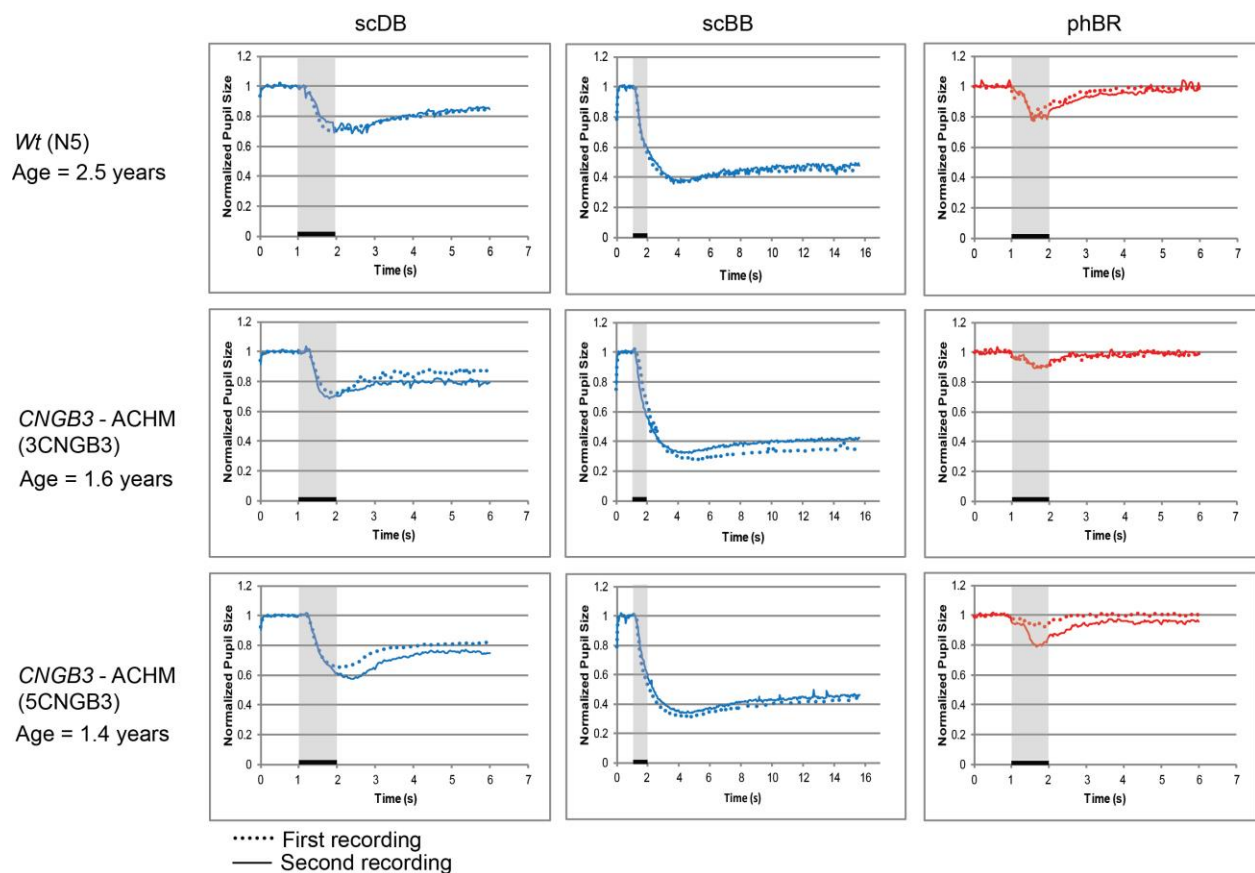

**Supplementary Figure S5.** Comparison between initial chromatic pupillometry testing results in 1 *wt* and 2 *CNGB3*-mutant dogs with those seen 4-5 months after the first recording. No obvious differences were seen between the first and second recordings for any PLR parameters. The *CNGB3*-mutant dogs were affected by incomplete ACHM with recordable response to phBR.

|                         |                                                                      |              |
|-------------------------|----------------------------------------------------------------------|--------------|
| Podarcis sicus          | -----MGTQH                                                           | 5            |
| Mus musculus            | MDSPSGPRVLSLTQDPSTTSPA-LQGIWNGTQN-VSVRAQLLSVSPSTSAHQAAAVP            | 58           |
| Rattus norvegicus       | MNPSSESRVPSSLTQDPSTTSPA-LQGIWNSTQN-ISVRVQLLSVSPSTPGLQAAAVP           | 59           |
| Homo sapien             | MNPPSGPRVPPSPTEPSCMATPA-P-PSWWDSSQSSISLGRLPSPSTAPGTWAAAVP            | 59           |
| Felis catus             | MNPPSGPR-----TQEPSCVATPAS-PSRWGGRSSSTSSLDQLPISPTAARAQAAWI P          | 54           |
| <b>Canis familiaris</b> | <b>MNPPSGPG----AQEPGCVATAAS-PGRWHGSPRSTVGLDQALPTGPTAAGARAAWAP</b>    | <b>54</b>    |
| Podarcis sicus          | RIKVDVPRVLYTVGSCVTVIGSITGNLLVLMFYSNKRLRTPANYFIMNLAASDFLM             | 65           |
| Mus musculus            | SVTQAPVFDHAHYTLGTVILLVGLTGMLGNLTIVITFCRNRLRTPANMFIIINLAVSDFLM        | 118          |
| Rattus norvegicus       | FPTVDVPRDHAHYTLGTVILLVGLTGMLGNLTIVITFCRNRLRTPANMLIINLAVSDFLM         | 119          |
| Homo sapien             | LPTVDVPRDHAHYTLGTVILLVGLTGMLGNLTIVITFCRSRLRTPANMFIIINLAVSDFLM        | 119          |
| Felis catus             | FPTVDVPRDHAHYTLGTVILLVGLTGILGNLMVITFCRSRLRTPANMFIIINLAVSDFLM         | 114          |
| <b>Canis familiaris</b> | <b>FPTVDVPRDHAHYTLGTVILLVGLTGMLGNLMVITFCRTRGLRTPSNMFIIINLAVSDFLM</b> | <b>114</b>   |
| Podarcis sicus          | SATQAPICFINSMHTEWILGDIQCFYVFCGALFGITSMITLAIISVDRYCVITKPLQSI          | 125          |
| Mus musculus            | SFTQAPVFFASSLYKKWLFGETGCEFYAFCGAVFGITSMITLTAIAMDRYLVTIRPLATI         | 178          |
| Rattus norvegicus       | SFTQAPVFFASSLYKKWLFGETGCKFYAFCGAVFGITSMITLTAIAMDRYLVTIRPLATI         | 179          |
| Homo sapien             | SFTQAPVFFASSLYKKWLFGETGCEFYAFCGALFGITSMITLTAIALDRYLVTIRPLATF         | 179          |
| Felis catus             | SFTQAPVFFASSLHKRWLFGEAGCEFYAFCGALFGITSMITLMAIALDRYLVTIRPLATI         | 174          |
| <b>Canis familiaris</b> | <b>SFTQAPVFFASSLHKRWLFGEAGCEFYAFCGALFGITSMITLTAIALDRYLVTIRPLAAV</b>  | <b>174</b>   |
| Podarcis sicus          | KRSSKRRSCIIIAFVWLYSLGWSVCLFGWSSYIEGIMISCTWDVVSYPANRSYTMML            | 185          |
| Mus musculus            | GRGSKRRRTALVLLGVWLYALAWSLPFFFGWSAYVPEGLLTSCSDWYMTFTQVRAYTMML         | 238          |
| Rattus norvegicus       | GMRSKRRRTALVLLGVWLYALAWSLPFFFGWSAYVPEGLLTSCSDWYMTFTPLVRAYTMML        | 239          |
| Homo sapien             | GVASKRRRAAFVLLGVWLYALAWSLPFFFGWSAYVPEGLLTSCSDWYMSFTPAVRAYTMML        | 239          |
| Felis catus             | GVVSKRRRAAFVLLGVWLYALAWSLPFFFGWSAYVPEGLLTSCSDWYMSFTPSVRAYTMML        | 234          |
| <b>Canis familiaris</b> | <b>GVVSKRRRAAFVLLGVWLYALAWSLPFFFGWSAYVPEGLLTSCSDWYMSFTPSVRAYTMML</b> | <b>234</b>   |
| Podarcis sicus          | CCFVFFIPLIIIFHCYLEMFLAIRSTGRNVQKLGSTY-----NRKSNVSVKSEWKL             | 239          |
| Mus musculus            | FCFVFFLPLIIIFCYIFIIFRAIRETGRA-----CEGCGESPLRQRQWRLQSEWKMA            | 292          |
| Rattus norvegicus       | FCFVFFLPLIIIFCYIFIIFRAIRETGRA-----CEGCGESPLR-RRQWRLQSEWKMA           | 292          |
| Homo sapien             | CCFVFFLPLIIIFYCYIFIIFRAIRETGRLQTFGACKNGESL---WQRRLQSECKMA            | 295          |
| Felis catus             | FCFVFFLPLVIVICYIFIIFRAIRETGRLQTFRACGGGRSP---RQRRLQREWKMA             | 290          |
| <b>Canis familiaris</b> | <b>FCFVFFLPLVIVICYIFIIFRAIRETGRLQTFRACGGGRSP---RQRRLQREWKMA</b>      | <b>290</b>   |
| Podarcis sicus          | KIAFVAIVFVFLSWSPYACVTLIAWAGYAKTLNPYKSVPAVIAKASAIYNPIIYAIHP           | 299          |
| Mus musculus            | KVALIVILLFVLWAPYSTVALVAGYSHILTPYMSVPAVIAKASAIHNPPIIYAIHP             | 352          |
| Rattus norvegicus       | KVALIVILLFVLWAPYSTVALVAGYSHILTPYMSVPAVIAKASAIHNPPIIYAIHP             | 352          |
| Homo sapien             | KIMLVILLFVLWAPYSAVALVAFAGYAHVLTYPYMSVPAVIAKASAIHNPPIIYAIHP           | 355          |
| Felis catus             | KIELVILLFVLWAPYSIVALMAFAGYAHVLTYPYMSVPAVIAKASAIHNPPIIYAIHP           | 350          |
| <b>Canis familiaris</b> | <b>KMELVILLFVLWAPYSAVALTAFAGYSHVLTYPYMSVPAVIAKASAIHNPPIIYAIHP</b>    | <b>350</b>   |
| Podarcis sicus          | KYRVALAQHLPCLGVLLGVSGQRSHPSLYRSTRSTLSQSQSDLSWISGRKRQ--ESLG           | 355          |
| Mus musculus            | KYRVALAQHLPCLGVLLGVSGQRSHPSLYRSTRSTLSQSQSDLSWISGRKRQ--ESLG           | 410          |
| Rattus norvegicus       | KYRVALAQHLPCLGVLLGVSGQRSHPSLYRSTRSTLSQSQSDLSWISGRKRQ--ESLG           | 410          |
| Homo sapien             | KYRVALAQHLPCLGVLLGVSGQRSHPSLYRSTRSTLTSHTNLSWISIRRRQ--ESLG            | 413          |
| Felis catus             | KYRVALAQHLPCLGVLLGVSGQHTGPYASYRSTRSTLSQASDLSWISGRRRQ--ASLG           | 408          |
| <b>Canis familiaris</b> | <b>KYRVALAQHLPCLGVLLGVSGQRTGPYASYRSTRSTLSQASDLSWISGRRRQ--ASLG</b>    | <b>408</b>   |
| Podarcis sicus          | SAEETWSDMELEPVEAARKKQPHRSRSFSKQAEETGLLL--KTQSCNVLTGEKVAVS            | 413          |
| Mus musculus            | SESEVGWTDTTTAAWGAA---QASGQSFCSQNLDEGLKASSSPQVQRSKTPKV-PGP            | 466          |
| Rattus norvegicus       | SESEVGWTDTTTAAWGAA---QASGQSFCSHDLDEGEVKA PSSPQEQKSKTPKT-KRH          | 466          |
| Homo sapien             | SESEVGWTHMATAAVWGAA---QANGRSLYGQGLEDEAKAPPRPQGHEAETPGK-TKG           | 469          |
| Felis catus             | SESEVGWMDTAAAVWGAA---QVSGRFPSCQGLEDEAKAPVRPQGREAETPGQ-AMT            | 464          |
| <b>Canis familiaris</b> | <b>SESEVGWMDTAAAVWGAA---QVSGRFPSCQGLEDEAKAPLRPQGREAETPGK-VVT</b>     | <b>464</b>   |
| Podarcis sicus          | SISLHDPFERSFGENAPELRLP-----SCLRTSSLPFGLNS----SSTEENADTSDM            | 462          |
| Mus musculus            | S--TCRPM---KGQGARPSLRGDQKGLAVCTGLSECPHPHTSQFPLAFLEDDVTL---           | 518          |
| Rattus norvegicus       | LPSLDRM-----D-----PRM-----                                           | 474          |
| Homo sapien             | LIPSQ-----D-----PRM-----                                             | 478          |
| Felis catus             | MAMAPW-----DT-----PANCELPLHPGWAFH-----                               | 487          |
| <b>Canis familiaris</b> | <b>TATAAW-----DP-----PLHPGWAFQ-----</b>                              | <b>481</b>   |
| Podarcis sicus          | SISLHDPFERSFGENAPELRLP-----SCLRTSSLPFGLNS----SSTEENADTSDM            | 462          |
| Mus musculus            | S--TCRPM---KGQGARPSLRGDQKGLAVCTGLSECPHPHTSQFPLAFLEDDVTL---           | 518          |
| Rattus norvegicus       | LPSLDRM-----D-----PRM-----                                           | 474          |
| Homo sapien             | LIPSQ-----D-----PRM-----                                             | 478          |
| Felis catus             | MAMAPW-----DT-----PANCELPLHPGWAFH-----                               | 487          |
| <b>Canis familiaris</b> | <b>TATAAW-----DP-----PLHPGWAFQ-----</b>                              | <b>481</b>   |
| Podarcis sicus          | EVQEQHQMEASSH                                                        | 475          |
| Mus musculus            | -----RHL-----                                                        | 521          |
| Rattus norvegicus       | -----                                                                | 474          |
| Homo sapien             | -----                                                                | 478          |
| Felis catus             | -----                                                                | 487          |
| <b>Canis familiaris</b> | <b>-----</b>                                                         | <b>481</b>   |
| Identity                |                                                                      |              |
| Podarcis sicus          | 475                                                                  | 46.63%       |
| Mus musculus            | 521                                                                  | 75.37%       |
| Rattus norvegicus       | 474                                                                  | 75.38%       |
| Homo sapien             | 478                                                                  | 78.94%       |
| Felis catus             | 487                                                                  | 89.60%       |
| <b>Canis familiaris</b> | <b>481</b>                                                           | <b>-----</b> |

**Supplemental Figure S6.** Alignment of the predicted amino acid sequence of canine melanopsin with those of other species: Italian wall lizard (*Podarcis siculus*), mouse (*Mus musculus*), rat (*Rattus norvegicus*), human (*Homo sapiens*), and cat (*Felis catus*). Residues that are identical to those of the canine sequence are *shaded*. Percentage identity of canine melanopsin to those of other species is reported at the end of the alignment.

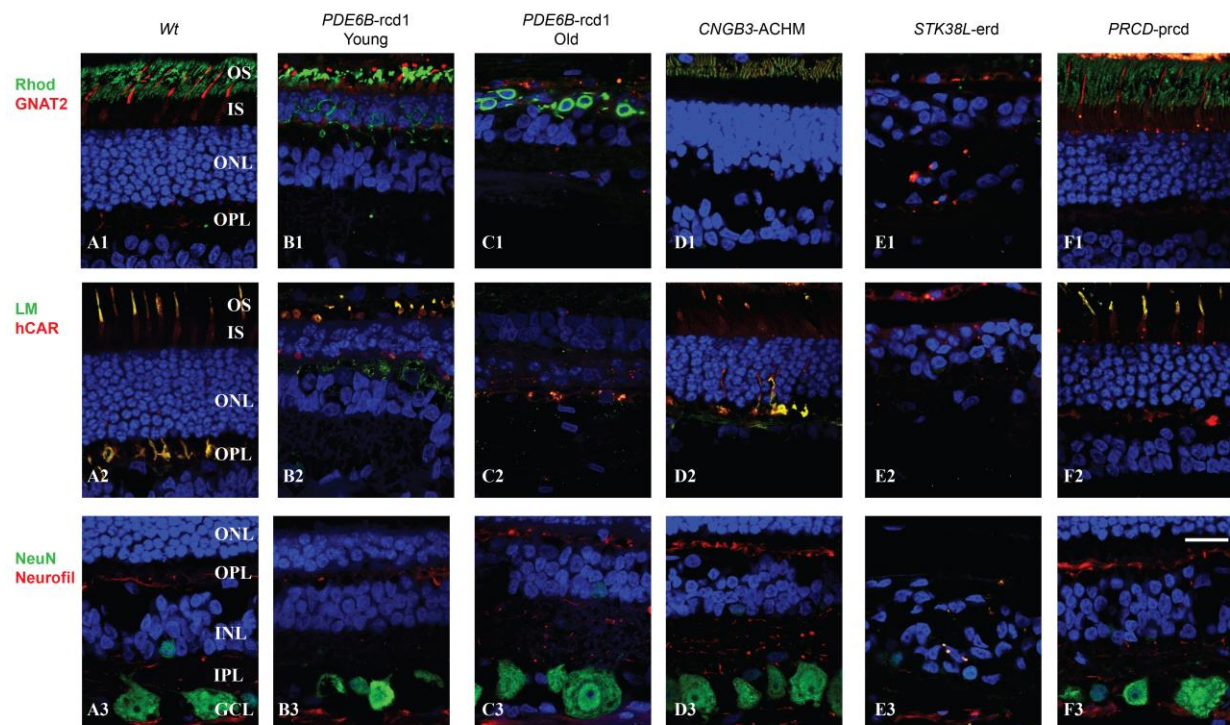

**Supplementary Figure S7.** Immunolabeling of *wt* and mutant retinas. In young and old *PDE6B*-mutant dogs rhodopsin (Rho) is mislocalized from OS to IS and cell bodies; rod OS are stunted (*young*, B1) and lost (*old*, C1). Cone OS (GNAT2, hCAR, and LM) are short (*young*, B1 and B2) and eventually lost (*old*, C1 and C2), and the ONL shows progressive thinning. In *CNGB3*-mutant dogs, rods (Rhod) are present with normal OS (D1). Fewer and abnormally-shaped cone OS are seen compared to those in *wt* (hCAR, LM in D2), and they lack detectable GNAT2 (D1). *STK38L*-affected dog with advanced disease shows severe degeneration of retina, with loss of characteristic layering: No rod and cone photoreceptors are present (E1, E2). In *PRCD*-mutant dogs, both rods and

cones are still present with normal localization of their specific markers Rho, GNAT2, LM, and hCAR despite reduced ONL thickness (*F1*, *F2*). In all mutants except the *STK38L*-mutant dog (*E3*), dendrites/axons of secondary neurons (*Neurofil*) as well as RGC (*NeuN*) are well-preserved (*A2*, *B3*, *C3*, *D3*, *F3*). Cell nuclei are shown in *blue* with DAPI. Calibration *bar* = 20  $\mu$ m. OS, outer segment; IS, inner segment; ONL, outer nuclear layer; OPL, outer plexiform layer; Rhod, rhodopsin; LM, long- and medium-wavelength-absorbing cone opsin; hCAR, human cone arrestin; NeuN, Neuronal Nuclei; Neurofil, neurofilament.

| Photopigment | Canine     | Human  |
|--------------|------------|--------|
| Rhodopsin    | 506-510 nm | 495 nm |
| L-opsin      |            | 560 nm |
| M-opsin      |            | 530 nm |
| L/M-opsin    | 555 nm     |        |
| S-opsin      | 429-435 nm | 430 nm |
| Melanopsin   | 480 nm     | 480 nm |

**Supplementary Table S4.** Maximum spectral sensitivity of canine vs. human photoreceptors. Dogs are functional dichromats, having combined red/green (long- and medium-wavelength-absorbing, L/M) and blue (short-wavelength-absorbing, S) cone pigments with a maximal sensitivity of 555 nm and 429-435 nm, respectively.<sup>1,2</sup> Humans are trichromats having red (L), green (M), and blue (S) cone pigments with a maximal sensitivity of 560 nm, 530 nm, and 430 nm, respectively.<sup>3,4</sup> Canine rhodopsin has peak sensitivity of 506-510 nm (human rhodopsin maximal sensitivity: ~495 nm).<sup>1,5-7</sup> The spectral sensitivity of canine melanopsin has not been validated but it is assumed to be 480 nm, similar to other species, including humans.<sup>8-13</sup>

## Supplementary References

1. Jacobs GH, Deegan JF II, Crognale MA, Fenwick JA. Photopigments of dogs and foxes and their implications for canid vision. *Vis Neurosci*. 1993;10:173–180.
2. Neitz J, Geist T, Jacobs GH. Color vision in the dog. *Vis Neurosci*. 1989;3:119–125.
3. Schnapf JL, Kraft TW, Baylor DA. Spectral sensitivity of human cone photoreceptors. *Nature*. 1987;325:439–441.
4. Merbs SL, Nathans J. Absorption spectra of human cone pigments. *Nature*. 1992;356:433–435.
5. Kemp CM, Jacobson SG. Rhodopsin levels in the central retinas of normal miniature poodles and those with progressive rod-cone degeneration. *Exp Eye Res*. 1992;54:947–956.
6. Parkes JH, Aguirre G, Rockey JH, Liebman PA. Progressive rodcone degeneration in the dog: characterization of the visual pigment. *Invest Ophthalmol. Vis Sci*. 1982;23:674–678.
7. Kraft TW, Schneeweis DM, Schnapf JL. Visual transduction in human rod photoreceptors. *J Physiol*. 1993;464:747–765.
8. Hattar S, Liao HW, Takao M, Berson DM, Yau KW. Melanopsin-containing retinal ganglion cells: architecture, projections, and intrinsic photosensitivity. *Science*. 2002;295:1065–1070.
9. Hattar S, Lucas RJ, Mrosovsky N, et al. Melanopsin and rodcone photoreceptive systems account for all major accessory visual functions in mice. *Nature*. 2003;424:76–81.
10. Guler AD, Ecker JL, Lall GS, et al. Melanopsin cells are the principal conduits for rod-cone input to non-image-forming vision. *Nature*. 2008;453:102–105.
11. Gamlin PD, McDougal DH, Pokorny J, Smith VC, Yau KW, Dacey DM. Human and macaque pupil responses driven by melanopsin-containing retinal ganglion cells. *Vision Res*. 2007;47:946–954.
12. Dacey DM, Liao HW, Peterson BB, et al. Melanopsin-expressing ganglion cells in primate retina signal colour and irradiance and project to the LGN. *Nature*. 2005;433:749–754.
13. Provencio I, Rodriguez IR, Jiang G, Hayes WP, Moreira EF, Rollag MD. A novel human opsin in the inner retina. *J Neurosci*. 2000;20:600–605.
